# Supplementary material for: Suppression of Mig-6 overcomes the acquired EGFR-TKI resistance of lung adenocarcinoma
Source: Springer Nature journal article supplement (doi:10.1186/s12885-020-07057-z), 2020-06-18
Supplement: MOESM1 [file 18097202]

Table 1. Clinicopathologic parameters of patients from TCGA database (N=514)

| Variables             |                          | Mean $\pm$ SD or number of patients (%) |
|-----------------------|--------------------------|-----------------------------------------|
| Age, years            |                          | 65.4 $\pm$ 9.9                          |
| Gender                | Male                     | 238 (46.3)                              |
|                       | Female                   | 276 (53.7)                              |
| Smoking history       | Never                    | 165 (32.1)                              |
|                       | Former or current smoker | 349 (67.9)                              |
| Anatomic site         | RUL                      | 186 (36.2)                              |
|                       | RML                      | 21 (4.1)                                |
|                       | RLL                      | 95 (18.5)                               |
|                       | LUL                      | 120 (23.3)                              |
|                       | LLL                      | 77 (15.0)                               |
|                       | Unknown                  | 15 (2.9)                                |
| T stage               | T1                       | 170 (33.1)                              |
|                       | T2                       | 279 (54.3)                              |
|                       | T3                       | 46 (8.9)                                |
|                       | T4                       | 19 (3.7)                                |
| Lymph node metastasis | N0                       | 342 (66.5)                              |
|                       | N1                       | 96 (18.7)                               |
|                       | N2                       | 74 (14.4)                               |
|                       | N3                       | 2 (0.4)                                 |
| Metastasis            | M0                       | 489 (95.1)                              |
|                       | M1                       | 25 (4.9)                                |
| EGFR mutation         | Wild type                | 452 (87.9)                              |
|                       | Mutant                   | 62 (12.1)                               |

Table 2. Relationships between *ERRF1* expression and clinicopathological factors in total patients (N=514)

| Variables             |                   | No. of patients | <i>ERRF1</i>              |                            | <i>P</i> value |
|-----------------------|-------------------|-----------------|---------------------------|----------------------------|----------------|
|                       |                   |                 | Low expression<br>(N=257) | High expression<br>(N=257) |                |
| Age, years            |                   |                 | 66.0 ± 9.6                | 64.8 ± 10.2                | 0.182          |
| Gender                | Male              | 238 (46.3)      | 120 (46.7)                | 118 (45.9)                 | 0.930          |
|                       | Female            | 276 (53.7)      | 137 (53.3)                | 139 (54.1)                 |                |
| Smoking history       | Never             | 165 (32.1)      | 90 (35.0)                 | 75 (29.2)                  | 0.186          |
|                       | Former or current | 349 (67.9)      | 167 (65.0)                | 182 (70.8)                 |                |
| Anatomic site         | RUL               | 186 (36.2)      | 105 (40.9)                | 81 (31.5)                  | 0.095          |
|                       | RML               | 21 (4.1)        | 10 (3.9)                  | 11 (4.3)                   |                |
|                       | RLL               | 95 (18.5)       | 41 (16.0)                 | 54 (21.0)                  |                |
|                       | LUL               | 120 (23.3)      | 50 (19.5)                 | 70 (27.2)                  |                |
|                       | LLL               | 77 (15.0)       | 43 (16.7)                 | 34 (13.2)                  |                |
|                       | Unknown           | 15 (2.9)        | 8 (3.1)                   | 7 (2.7)                    |                |
| T stage               | T1                | 170 (33.1)      | 102 (39.7)                | 68 (26.5)                  | 0.009*         |
|                       | T2                | 279 (54.3)      | 129 (50.2)                | 150 (58.4)                 |                |
|                       | T3                | 46 (8.9)        | 17 (6.6)                  | 29 (11.3)                  |                |
|                       | T4                | 19 (3.7)        | 9 (3.5)                   | 10 (3.9)                   |                |
| Lymph node metastasis | N0                | 342 (66.5)      | 187 (72.8)                | 155 (60.3)                 | 0.029*         |
|                       | N1                | 96 (18.7)       | 39 (15.2)                 | 57 (22.2)                  |                |
|                       | N2                | 74 (14.4)       | 30 (11.7)                 | 44 (17.1)                  |                |
|                       | N3                | 2 (0.4)         | 1 (0.4)                   | 1 (0.4)                    |                |
| Metastasis            | M0                | 489 (95.1)      | 244 (94.9)                | 245 (95.3)                 | 1.000          |
|                       | M1                | 25 (4.9)        | 13 (5.1)                  | 12 (4.7)                   |                |
| EGFR mutation         | Wild type         | 452 (87.9)      | 221 (86.0)                | 231 (89.9)                 | 0.223          |
|                       | Mutant            | 62 (12.1)       | 36 (14.0)                 | 26 (10.1)                  |                |

\**P* < 0.05 between the two categories for a given variable.

Table 3. Upregulated signaling in group with high *ERRF1* expression compared to in group with low *ERRF1* expression using GO analysis (Total patients)

| GO terms                                    | Fold | <i>P</i> value |
|---------------------------------------------|------|----------------|
| G1/S transition of mitotic cell cycle       | 2.99 | 0.015          |
| Regulation of mitotic nuclear division      | 2.56 | 0.001          |
| Mitotic cell cycle                          | 2.31 | <0.001         |
| Response to hypoxia                         | 2.27 | 0.002          |
| Positive regulation of cell migration       | 2.12 | <0.001         |
| Angiogenesis                                | 2.08 | 0.032          |
| Positive regulation of cell proliferation   | 1.75 | <0.001         |
| Cellular response to cytokine stimulus      | 1.70 | <0.001         |
| Positive regulation of cell differentiation | 1.62 | 0.006          |

Table 4. Upregulated signaling in group with high *ERRF1* expression compared to in group with low *ERRF1* expression using GO analysis (Patients with EGFR mutation)

| GO terms                                    | Fold | <i>P</i> value |
|---------------------------------------------|------|----------------|
| Canonical glycolysis                        | 8.07 | 0.029          |
| Positive regulation of angiogenesis         | 3.22 | 0.009          |
| Cellular response to tumor necrosis factor  | 2.84 | 0.003          |
| Positive regulation of cell migration       | 2.45 | <0.001         |
| Positive regulation of cytokine production  | 2.24 | 0.023          |
| Inflammatory response                       | 2.21 | 0.007          |
| Cytokine-mediated signaling pathway         | 1.99 | 0.017          |
| Positive regulation of cell proliferation   | 1.90 | <0.001         |
| Positive regulation of cell differentiation | 1.76 | 0.020          |

Table 5. Characteristics of patents who underwent re-biopsy of adenocarcinoma.

| Patient | Age ranges | Initial stage | Initial biopsy (EGFR mutation) | Re-biopsy (acquired T790M) | Duration of 1 <sup>st</sup> EGFR-TKI (months) | IHC                                                                 |
|---------|------------|---------------|--------------------------------|----------------------------|-----------------------------------------------|---------------------------------------------------------------------|
| 1       | 50's       | IVB           | E19 del                        | (+)                        | 18                                            | NA                                                                  |
| 2       | 60's       | IVA           | E19 del                        | (-)                        | 17                                            | CK7/CK19/TTF-1(+), ALK (-)                                          |
| 3       | 50's       | IVB           | L858R                          | (+)                        | 10                                            | TTF-1 (+), ALK (-)                                                  |
| 4       | 70's       | IVB           | L858R                          | (-)                        | 10                                            | TTF-1/Napsin-A(+), CD56/p63(-), Synaptophysin(-) Ki-67 10%, ALK (-) |
| 5       | 60's       | IVA           | L858R or L861Q                 | (-)                        | 9                                             | ALK (-)                                                             |
| 6       | 50's       | IVB           | L858R or L861Q                 | (+)                        | 26                                            | ALK (-)                                                             |
| 7       | 70's       | IVB           | L858R                          | (-)                        | 5                                             | NA                                                                  |
| 8       | 60's       | IVB           | E19 del                        | (+)                        | 25                                            | ALK (-)                                                             |
| 9       | 50's       | IVB           | E19 del                        | (+)                        | 18                                            | ALK (-)                                                             |
| 10      | 70's       | IVB           | G719X                          | (+)                        | 18                                            | ALK (-)                                                             |
| 11      | 50's       | IVA           | E19 del                        | (+)                        | 23                                            | NA                                                                  |
| 12      | 60's       | IVA           | E19 del                        | (+)                        | 10                                            | ALK (-)                                                             |
| 13      | 50's       | IVB           | L858R                          | (-)                        | 16                                            | NA                                                                  |
| 14      | 80's       | IVA           | G719X                          | (-)                        | 16                                            | TTF-1/Napsin-A(+), CD5/6(+), Synaptophysin(+) Ki-67 10%, ALK (-)    |
| 15      | 50's       | IVB           | L858R                          | (-)                        | 5                                             | TTF-1/Napsin-A(+), CD56/p63(-), Synaptophysin(+) Ki-67 20%, ALK (-) |
| 16      | 60's       | IVB           | E19 del                        | (-)                        | 42                                            | TTF-1/Napsin-A(+), CD56/p63(-), Synaptophysin(-) Ki-67 10%          |
| 17      | 70's       | IVA           | E19 del                        | (-)                        | 11                                            | NA                                                                  |
| 18      | 50's       | IVA           | E19 del                        | (+)                        | 7                                             | TTF-1/Napsin-A(+), CD56/p63(-), Synaptophysin(-) Ki-67 10%, ALK (-) |
| 19      | 50's       | IV            | L858R                          | (+)                        | 16                                            | CK7(+), CK20(+), TTF-1(+), CDX-2 (-), ALK (-)                       |
| 20      | 30's       | IV            | 19del                          | (-)                        | 7                                             | TTF-1 (+), ALK (-)                                                  |
| 21      | 60's       | IIIB          | 19del                          | (+)                        | 10                                            | ALK (-)                                                             |
| 22      | 50's       | IB            | 19del                          | (+)                        | 14                                            | CK7 (+), CK20 (-), TTF-1 (+/-)                                      |
| 23      | 80's       | IVB           | L858R or L861Q                 | (+)                        | 16                                            | TTF-1(+), ALK (-)                                                   |
| 24      | 60's       | IVB           | 19del                          | (+)                        | 12                                            | TTF-1/Napsin-A(+), CD56/p63(-), Synaptophysin(-) Ki-67 10%, ALK (-) |
| 25      | 80's       | IVA           | 19del                          | (+)                        | 27                                            | TTF-1/Napsin-A(+), CD56/p63(-), Synaptophysin(-) Ki-67 10%, ALK (-) |
| 26      | 80's       | IVA           | 19del                          | (-)                        | 20                                            | TTF-1/Napsin-A(+), CD56/p63(-), Synaptophysin(-) Ki-67 5%, ALK (-)  |

(NA : not analyzed)

**Table 6. Comparison of variable proteins between decreased Mig6 expression group and increased Mig6 expression group in EGFR wild type and mutant patients using RPPA data**

| Variables          | EGFR WT (N=214)        |                  |             |                | EGFR Mutant (N=23)     |                 |             |                |
|--------------------|------------------------|------------------|-------------|----------------|------------------------|-----------------|-------------|----------------|
|                    | Mig6 expression change |                  | Fold change | <i>P</i> value | Mig6 expression change |                 | Fold change | <i>P</i> value |
|                    | Negative (n=89)        | Positive (n=125) |             |                | Negative (N=10)        | Positive (N=13) |             |                |
| GSK3 $\alpha\beta$ | -0.30885               | -0.2748          | 0.034052    | 0.324          | -0.14767               | -0.30333        | -0.15566    | 0.019*         |
| S6PS240S244        | 0.065217               | -0.17288         | -0.2381     | 0.001*         | 0.199263               | -0.2597         | -0.45896    | 0.020*         |
| 1433EPSILON        | -0.17225               | -0.12605         | 0.046195    | 0.060          | -0.25718               | -0.13258        | 0.124596    | 0.034*         |
| AKTPT308           | -0.35558               | -0.53536         | -0.17979    | 0.002*         | -0.48504               | -0.46223        | 0.022811    | 0.902          |
| AKTPS473           | -0.5156                | -0.72743         | -0.21183    | 0.011*         | -0.31145               | -0.29824        | 0.013214    | 0.961          |
| CMETPY1235         | 0.042103               | 0.055544         | 0.013441    | 0.622          | -0.06565               | 0.066223        | 0.131873    | 0.278          |
| NCADHERIN          | 0.260356               | 0.116585         | -0.14377    | 0.043*         | -0.18846               | -0.09498        | 0.093897    | 0.538          |
| EGFRPY1068         | 1.137038               | 1.043156         | -0.09388    | 0.623          | 3.654585               | 3.465294        | -0.18929    | 0.842          |
| P53                | -0.62962               | -0.51712         | 0.112502    | 0.081          | -0.6666                | -0.44694        | 0.219658    | 0.110          |

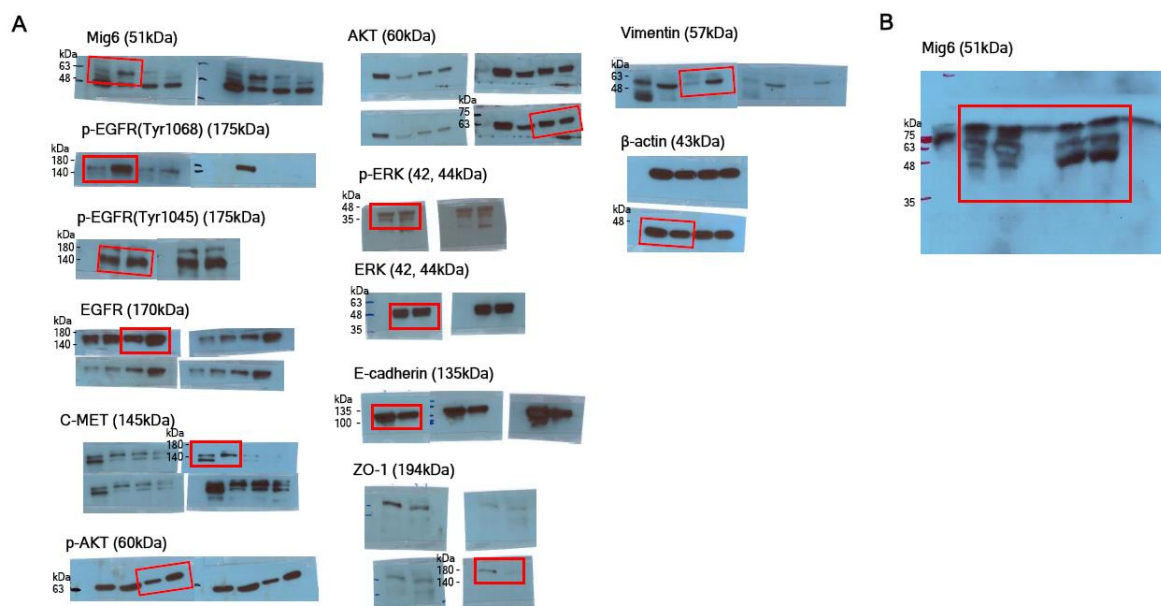

**Fig. S1.** (A) Original immunoblots of Mig-6, p-EGFR(Tyr1068), EGFR(Tyr1045), c-MET, p-AKT, AKT, p-ERK, ERK, E-cadherin, Zo-1, Vimentin and  $\beta$ -actin in **Fig. 1B**. (B) Original immunoblots of Mig-6 in **Fig. 1C**. Red rectangle indicates the cropped representative image in **Fig. 1**.

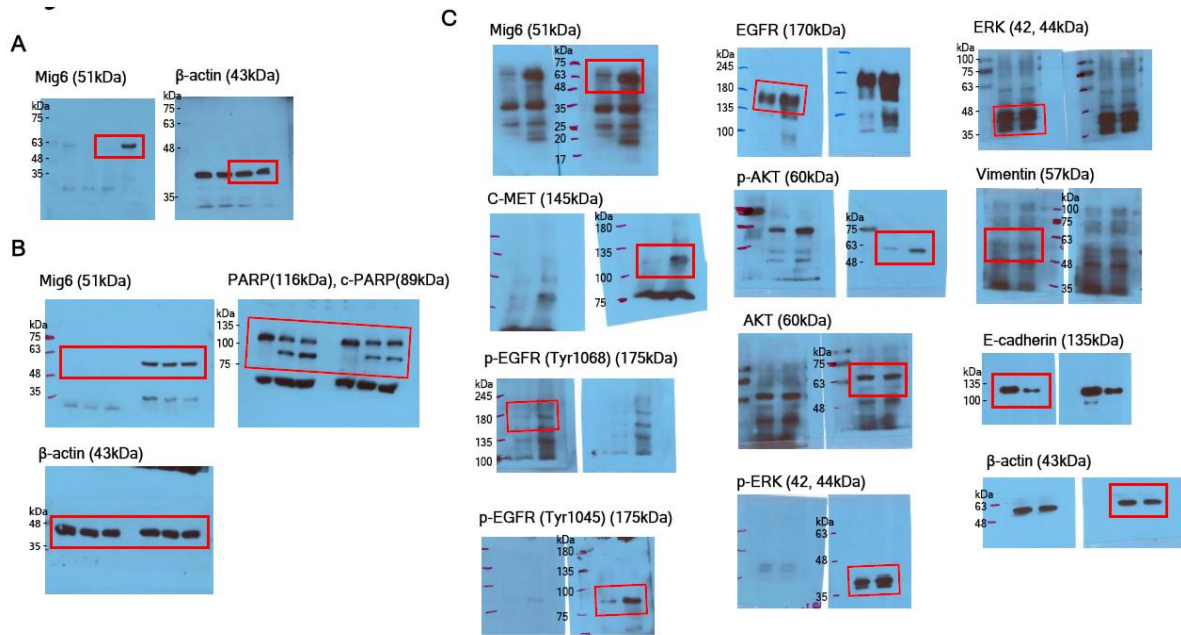

**Fig. S2.** (A) Original immunoblots of Mig-6 and β-actin in **Fig. 2A**. (B) Original immunoblots of Mig-6, PARP, c-PARP β-actin in **Fig. 2F**. (C) Original immunoblots of Mig-6, c-MET, p-EGFR(Tyr1066), p-EGFR(Tyr1045), EGFR, p-AKT, AKT, p-ERK, ERK, Vimentin, E-cadherin and β-actin in **Fig. 2G**. Red rectangle indicates the cropped representative image in **Fig. 2**.



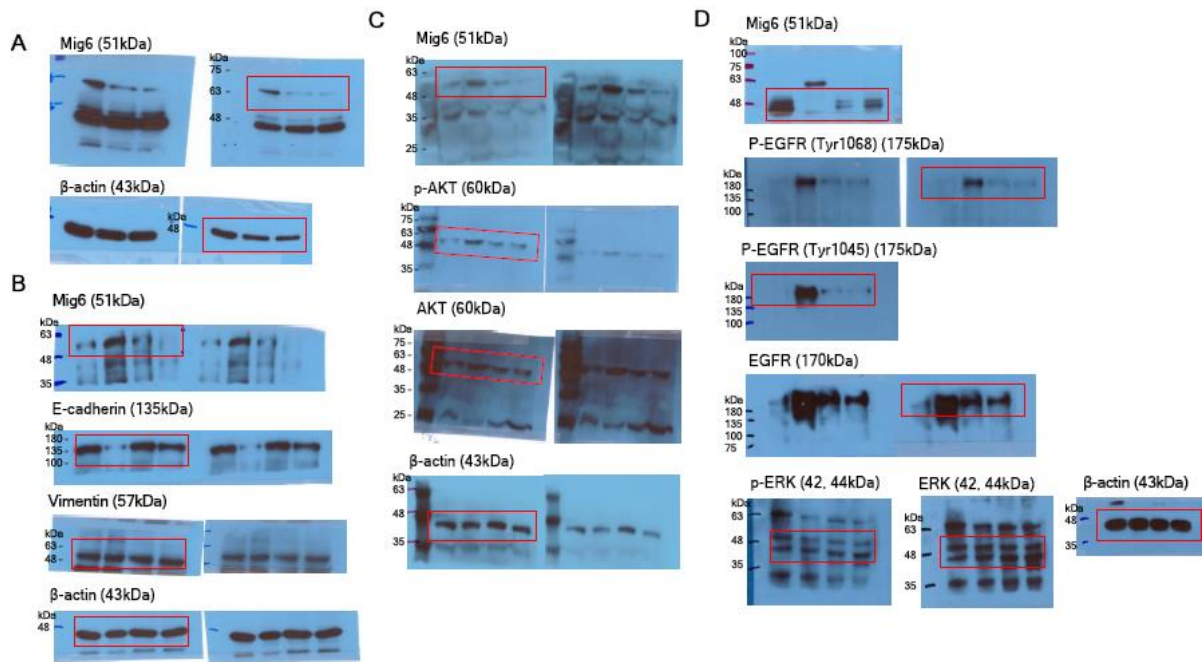

**Fig. S3.** (A) Original immunoblots of Mig-6 and  $\beta$ -actin in **Fig. 3A**. (B) Original immunoblots of Mig-6, E-cadherin, Vimentin,  $\beta$ -actin in **Fig. 3D**. (C) Original immunoblots of Mig-6, p-AKT, AKT,  $\beta$ -actin in **Fig. 3E**. (D) Original immunoblots of Mig-6, p-EGFR(Tyr1068), p-EGFR(Tyr1045), EGFR, p-ERK, ERK and  $\beta$ -actin in **Fig. 3F**. Red rectangle indicates the cropped representative image in **Fig. 3**.

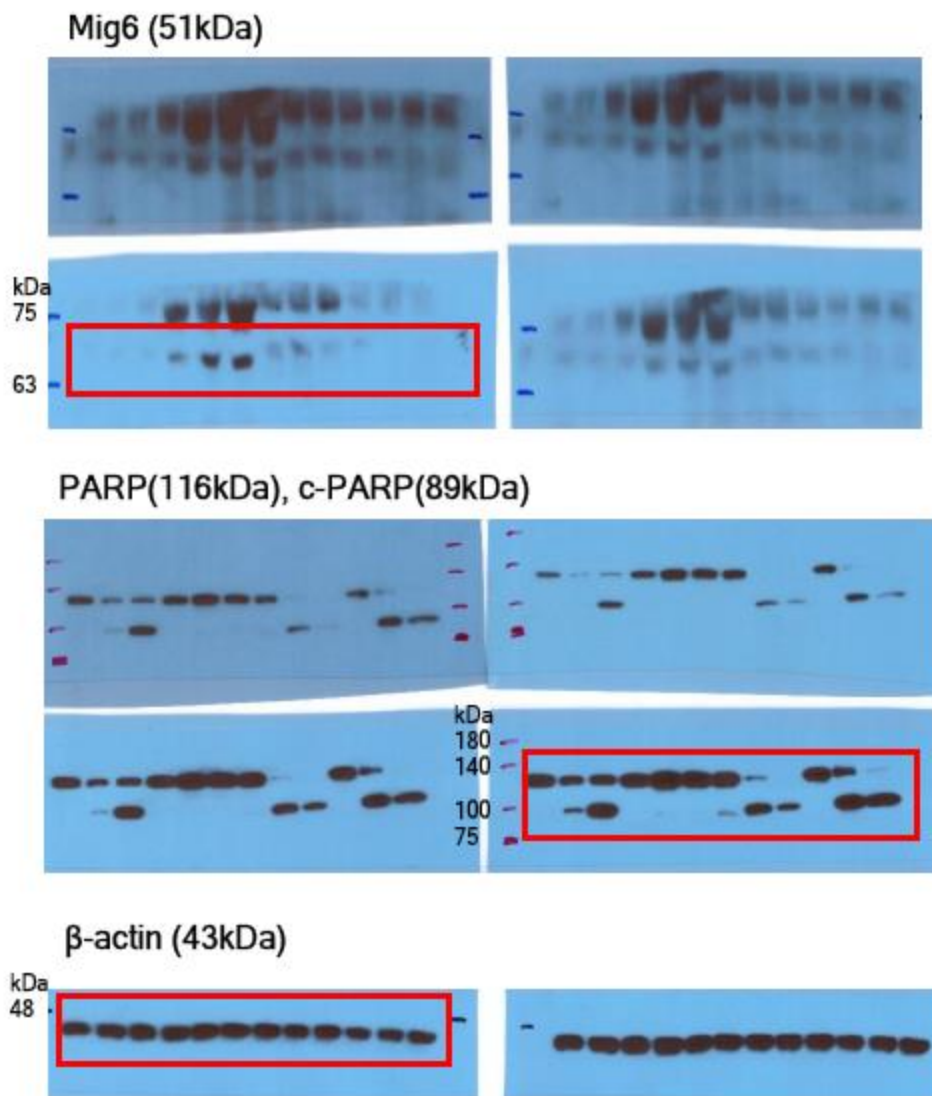

**Fig. S4.** Original immunoblots of Mig-6 PARP, c-PARP and  $\beta$ -actin in **Fig. 4B**. Red rectangle indicates the cropped representative image in **Fig. 4**.
